# Supplementary material
Source: PubMed Central journal article supplement (PMC4878669)

# SUPPLEMENTARY INFORMATION

doi:10.1038/nature17973

Figure 3a

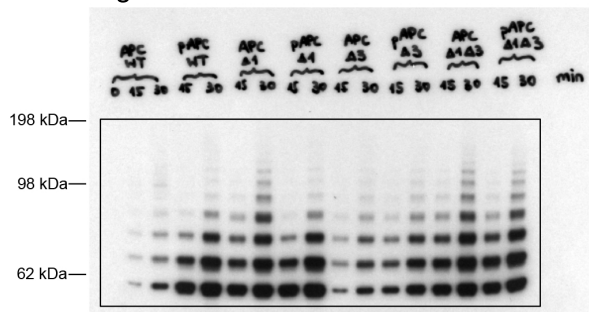

Figure 3b

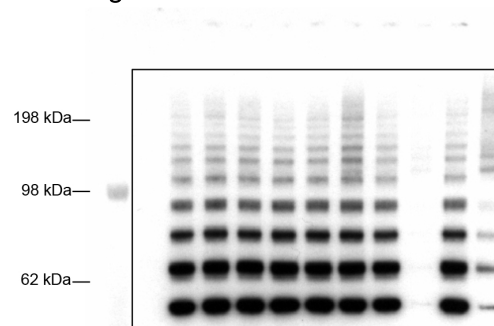

Figure 3d

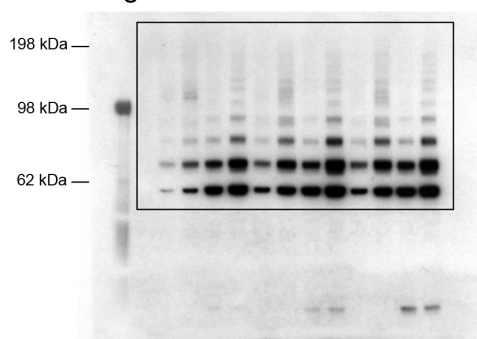

Figure 4b

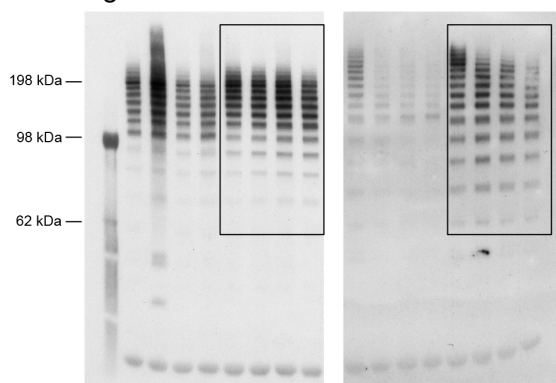

Extended Data Fig. 1a

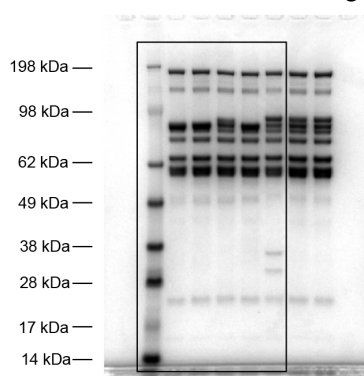

Extended Data Fig. 1b

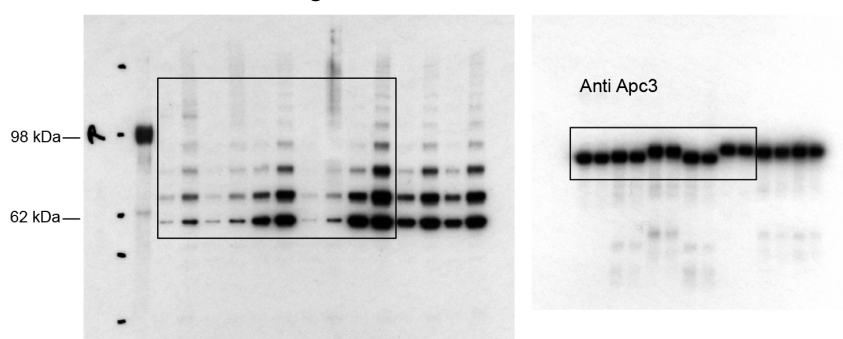

Anti Apc3

Extended Data Fig. 1c

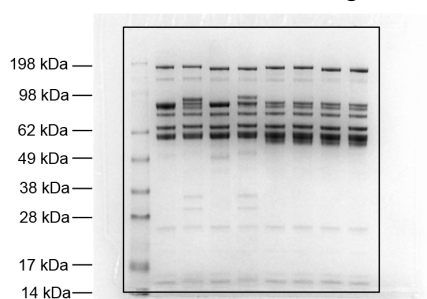

Extended Data Fig. 1d

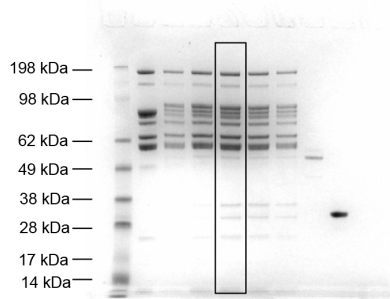

Extended Data Fig. 6a

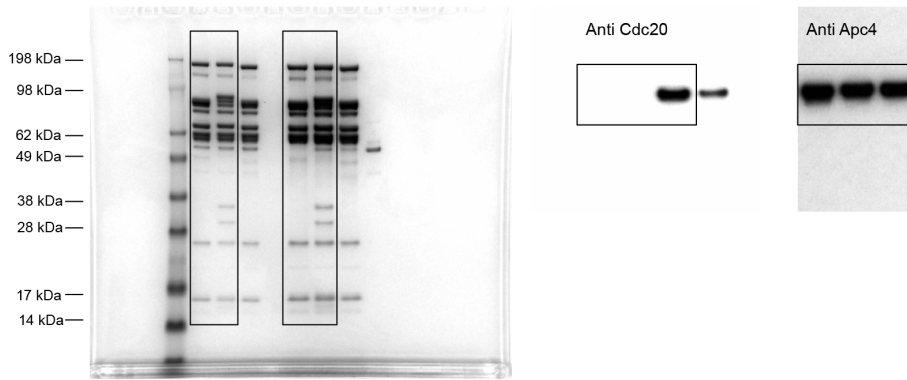

Extended Data Fig. 6b

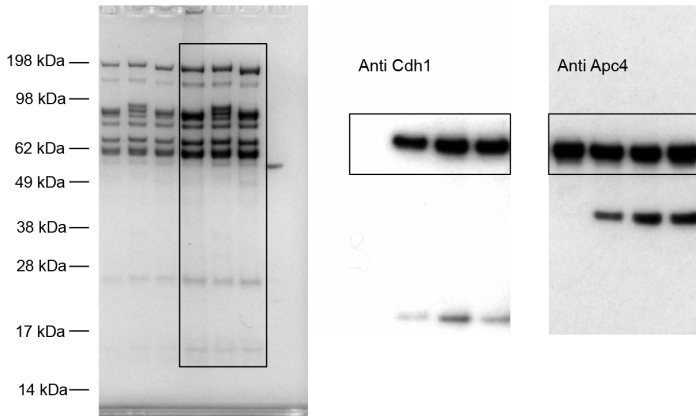

Extended Data Fig. 6c

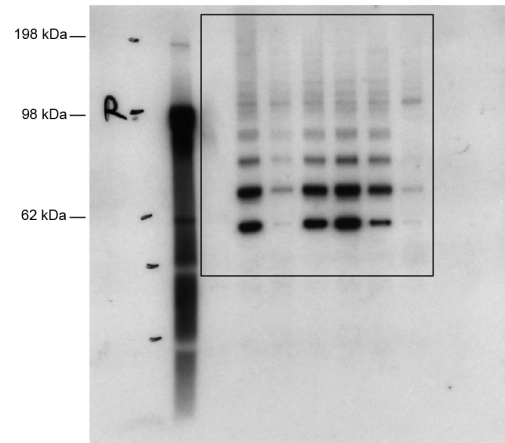

Extended Data Fig. 6d

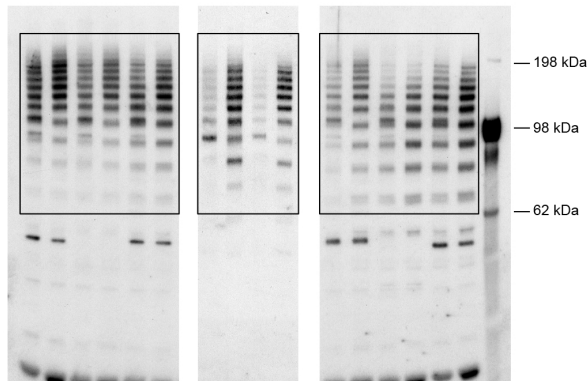

Extended Data Fig. 6e top

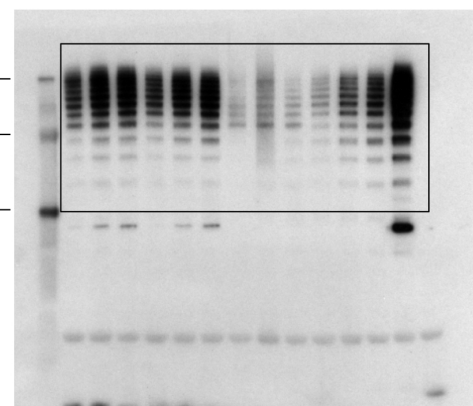

Extended Data Fig. 6e bottom

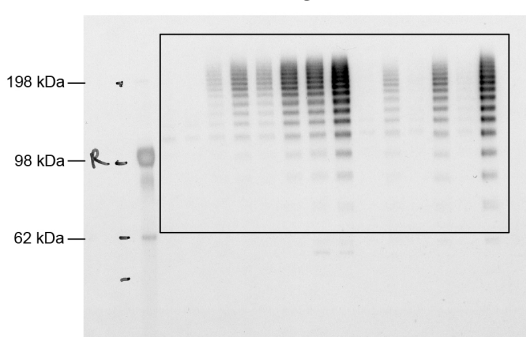

Extended Data Fig. 6f

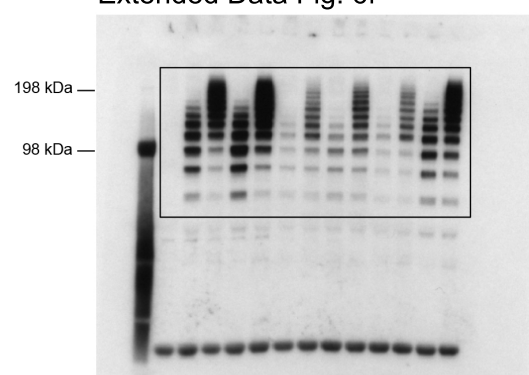

Supplement: NIHMS68083-supplement-Supplementary_Figure_1.pdf [file NIHMS68083-supplement-Supplementary_Figure_1.pdf]
